# Supplementary material for: GC-MS Analysis and Cytotoxicity Evaluation of Shammah (Smokeless Tobacco) Samples of Jazan Region of Saudi Arabia as Promoter of Cancer Cell Proliferation
Source: Hindawi journal article supplement (doi:10.1155/2019/3254836), 2019-04-15
Supplement: f1 [file 3254836.f1.pdf]

[illegible]
